# Supplementary material for: Comparison of recommendations from cirrhosis Clinical Practice Guidelines and from Cochrane systematic reviews
Source: Research Square preprint supplement (doi:10.21203/rs.3.rs-2194398/v1), 2022-11-08
Supplement: Supplementary file 1 [file 4627a2a2a5e4141e6208d00f.docx]

# Appendix

## Appendix 1 R-script for performing the analysis

# To run this script, the packages ‘tidyverse’, ‘meta’, and ‘metafor’ need to be installed.

install.packages(c("tidyverse","meta","metafor"))

# Load packages

library(tidyverse)

library(meta)

library(metafor)

# Describe data and convert this to a data frame

Guideline<- c("AASLD 2017","AASLD 2021","BSG 2015","BSG 2019","BSG 2020","EASL 2018","NICE CG141","NICE IPG631","NICE NG50")

TotalGuidelines<- c(7,7,6,2,8,27,1,1,3)

Agreement<- c(0,0,0,1,2,4,0,1,1)

df1 <- data.frame(Guideline, TotalGuidelines, Agreement)

# Perform meta-analysis (random-effects)

m1 <- metaprop(Agreement, TotalGuidelines, studlab=Guideline, data=df1, method="GLMM", method.tau="ML", random = TRUE)

# forest plot

forest(summary(m1),xlab="Proportion", fixed = F, random= T, xlim = c(0,1), fontsize=10, digits=3)
